# Supplementary material for: Evaluation of Adjuvant Chemotherapy-Associated Steatosis (CAS) in Colorectal Cancer
Source: MDPI journal article supplement (doi:10.3390/curroncol28040265), 2021-08-09
Supplement: s1 [file s1]

## Supplementary Figures

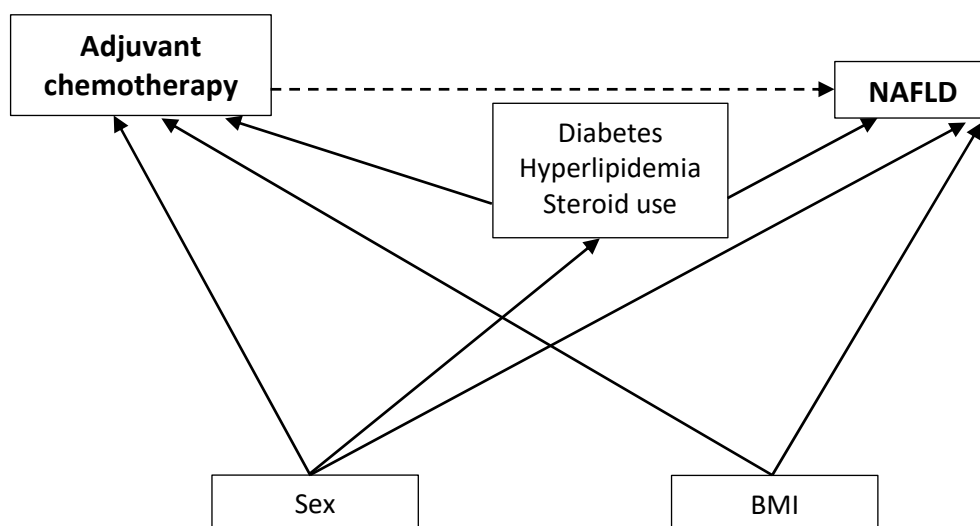

**Figure S1:** Directed Acyclic Graph (DAG) for the potential association between adjuvant chemotherapy and development of non-alcoholic fatty liver disease (NAFLD).

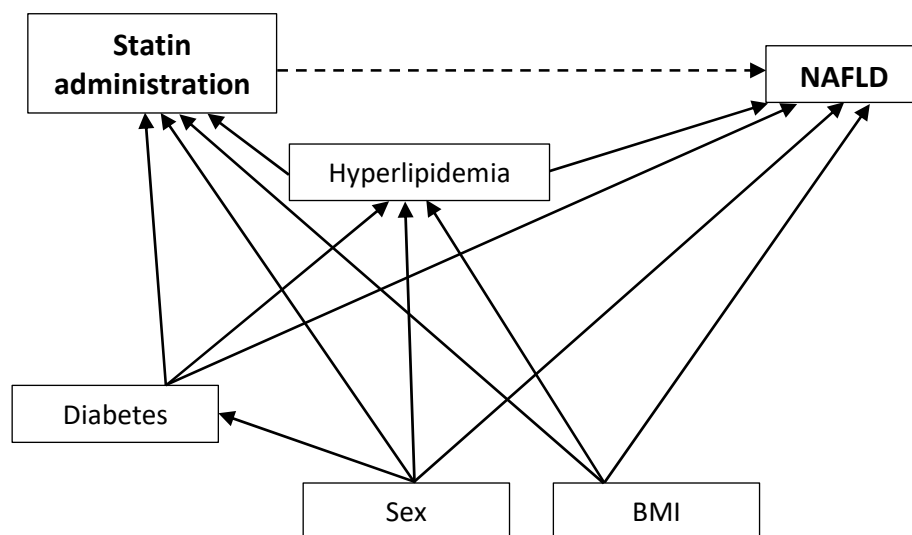

**Figure S2:** Directed Acyclic Graph (DAG) for the potential association between statin administration and development of non-alcoholic fatty liver disease (NAFLD).
